# Supplementary material for: The synthesis and comparison of poly(methacrylic acid)–poly(ε-caprolactone) block copolymers with and without symmetrical disulfide linkages in the center for enhanced cellular uptake
Source: Royal Society of Chemistry journal article supplement (doi:10.1039/c6ra15307k), 2016-01-01
Supplement: c6ra15307k1.pdf [file c6ra15307k1.pdf]

(a)

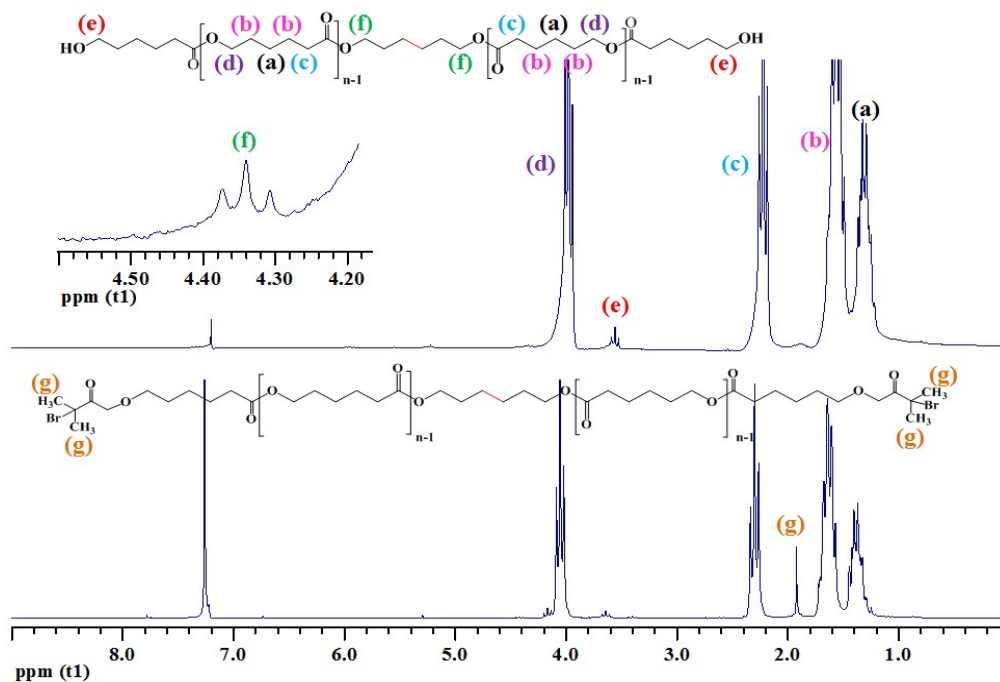

(b)

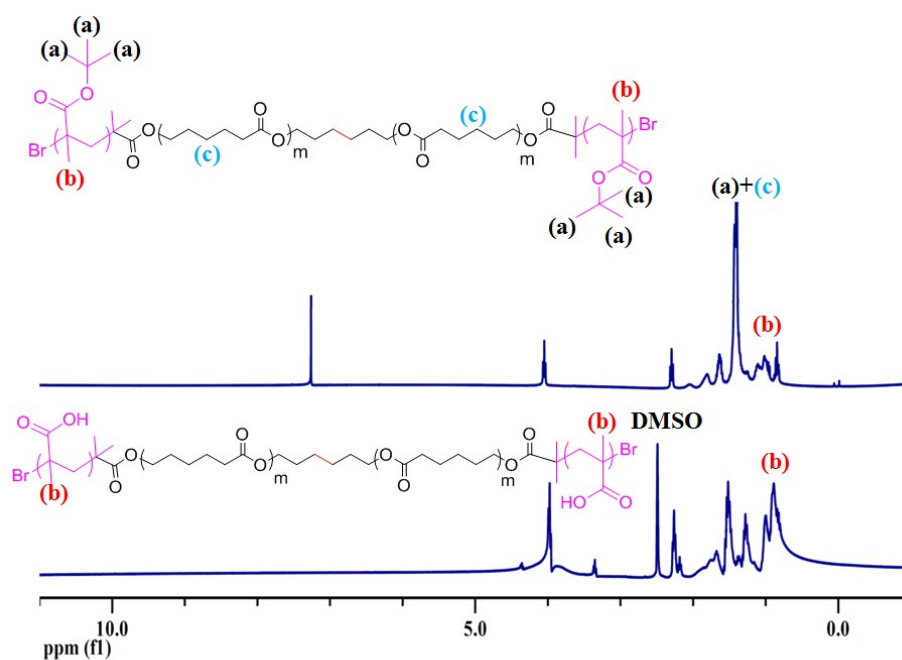

**Fig. S1.** The NMR spectra of (a) PCL-CC-PCL (top) and Br-PCL-CC-PCL-Br (bottom), (b) PtBMA-PCL-CC-PCL-PtBMA with a high length of *t*BMA (top), and PMAA-PCL-CC-PCL-PMAA (bottom).

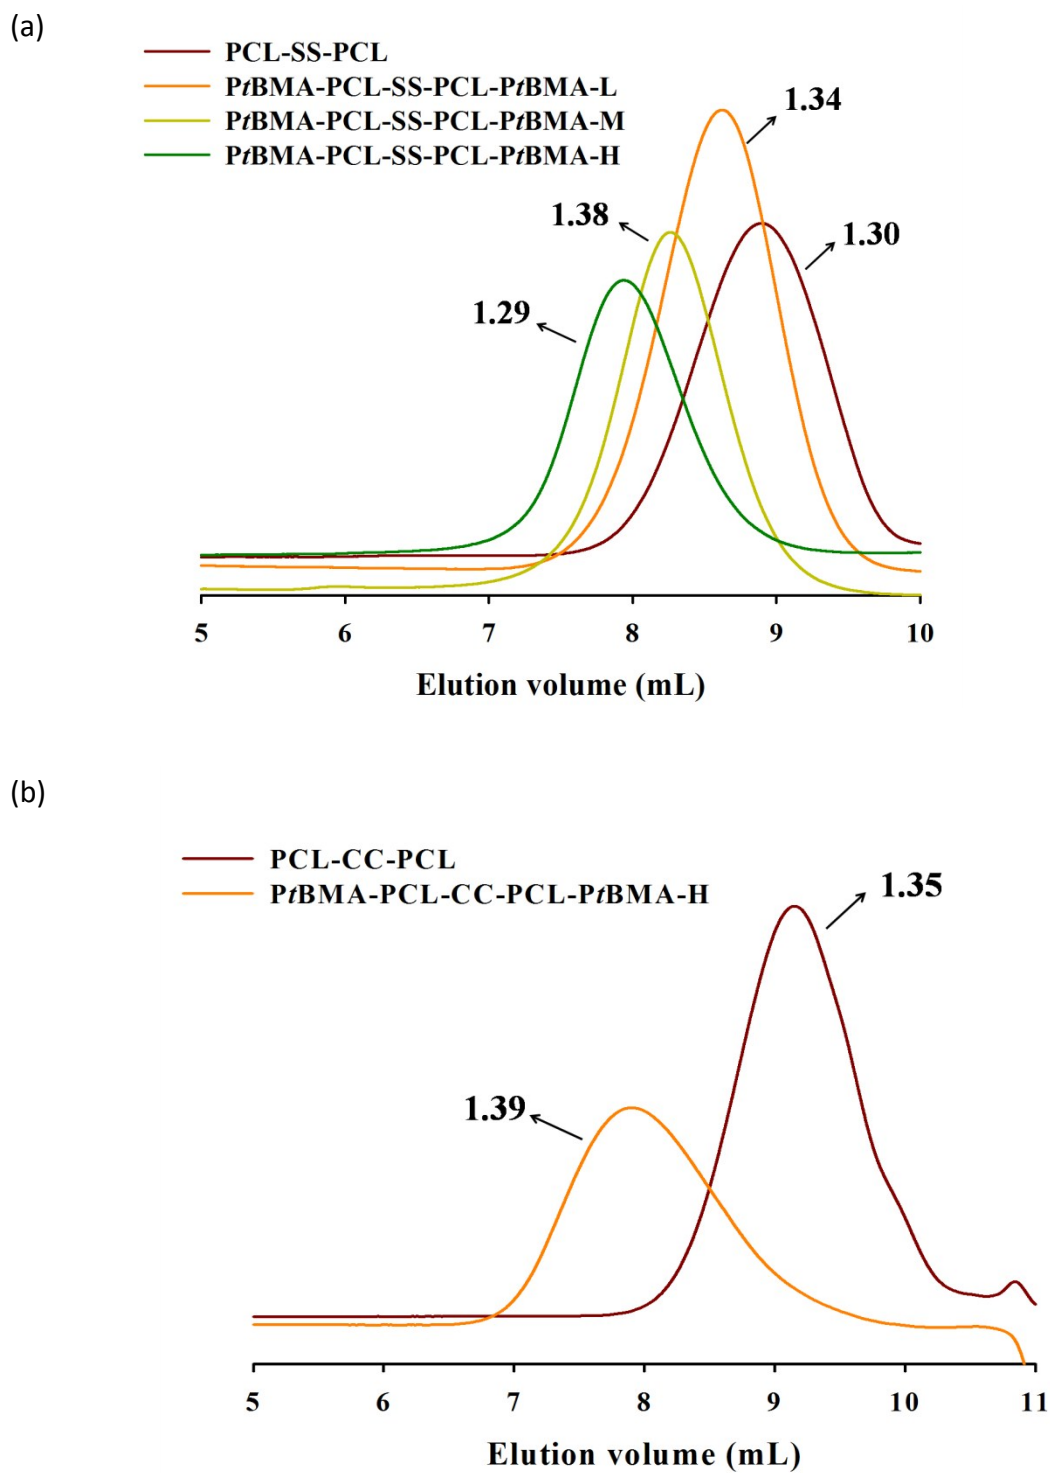

**Fig. S2.** GPC profiles of (a) PCL-SS-PCL and PtBMA-PCL-SS-PCL-PtBMA with low (L), middle (M) and high (H) lengths of *t*BMA; (b) PCL-CC-PCL and PtBMA-PCL-CC-PCL-PtBMA.

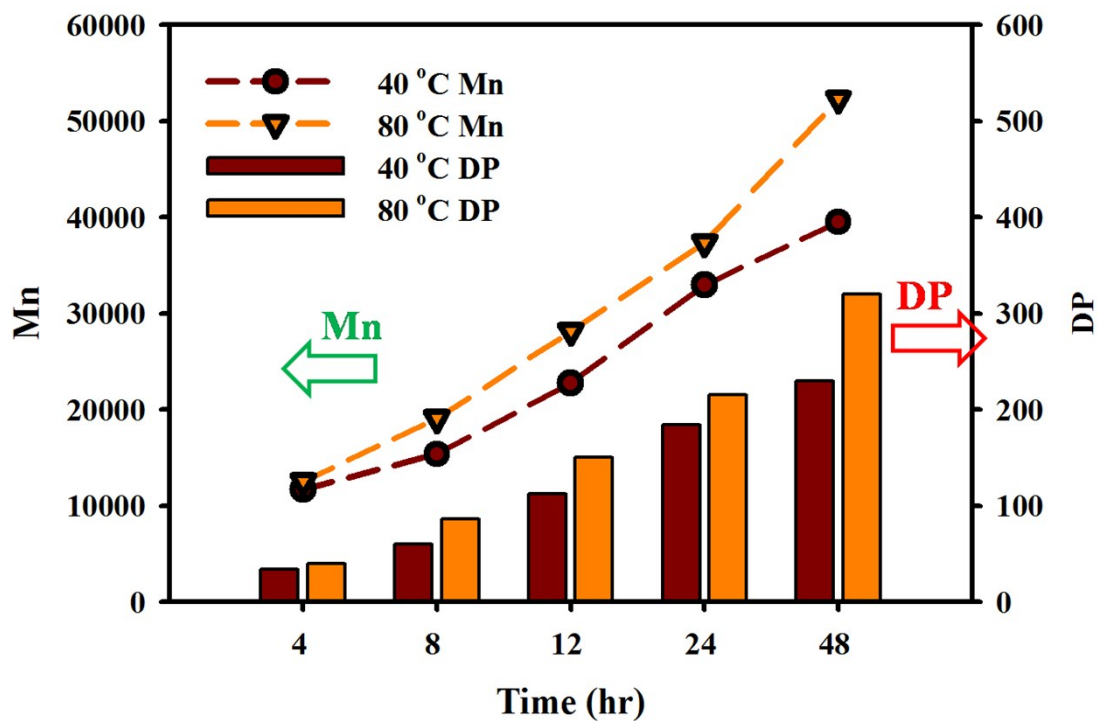

**Fig. S3.** The number average molecular weight of *Pt*BMA-PCL-SS-PCL-*Pt*BMA and the degree of polymerization (DP) of *t*BMA with reaction time at 40 or 80°C.

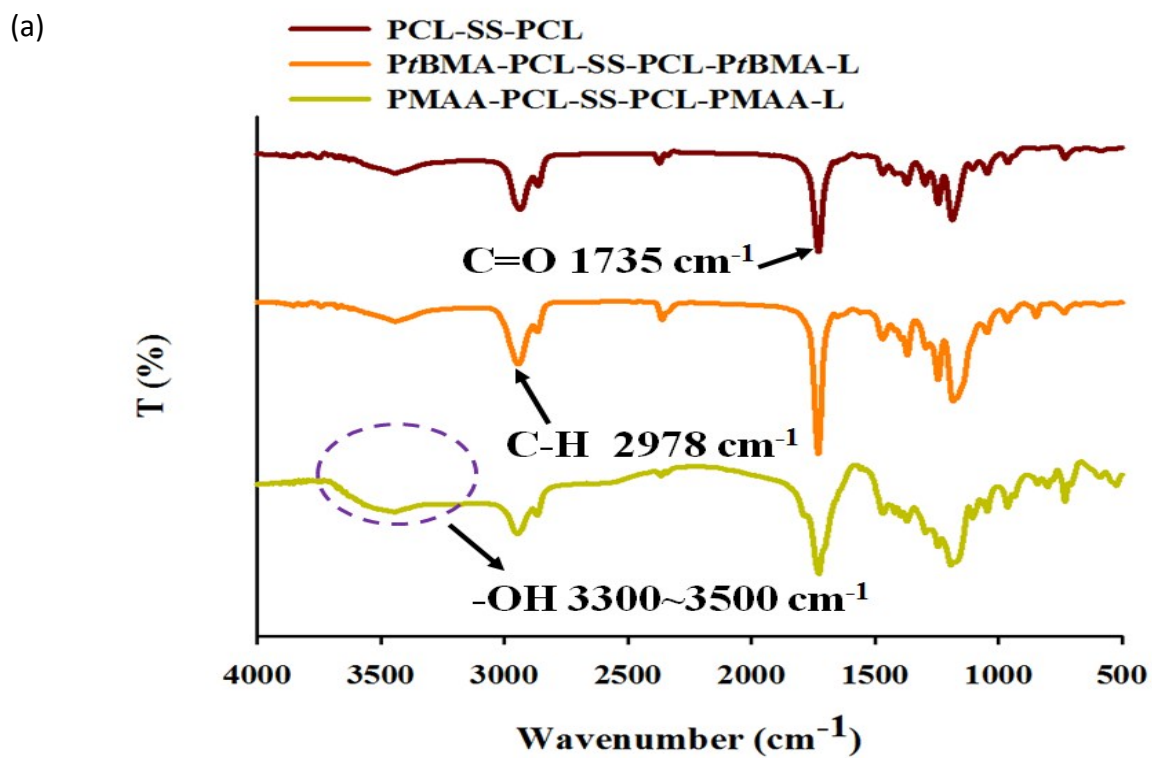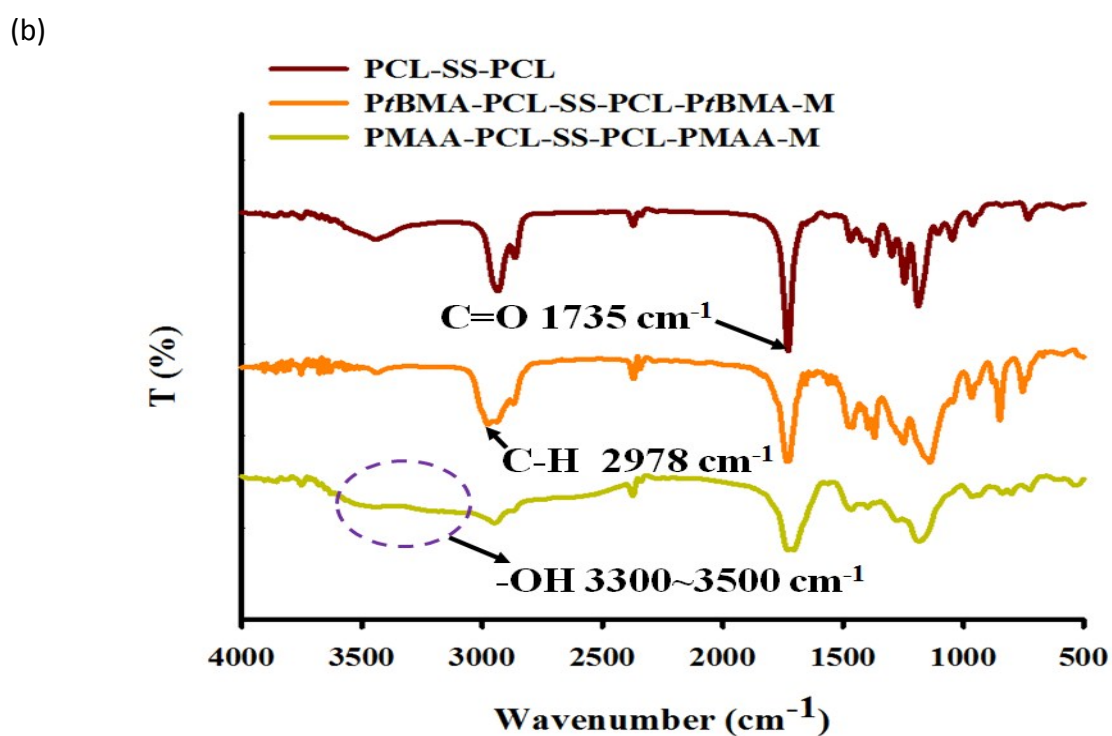

**Fig. S4.** FTIR spectra of PCL-SS-PCL, PtBMA-PCL-SS-PCL-PtBMA with (a) low (L) and (b) middle (M) lengths of *t*BMA, and their corresponding PMAA-PCL-SS-PCL-PMAA.
